# Supplementary material for: KDM4B and KDM4A promote endometrial cancer progression by regulating androgen receptor, c-myc, and p27kip1
Source: PubMed Central journal article supplement (PMC4741634; doi:10.18632/oncotarget.5165), 2015-09-11
Supplement: oncotarget-06-31702-s001.pdf [file oncotarget-06-31702-s001.pdf]

## SUPPLEMENTARY FIGURES

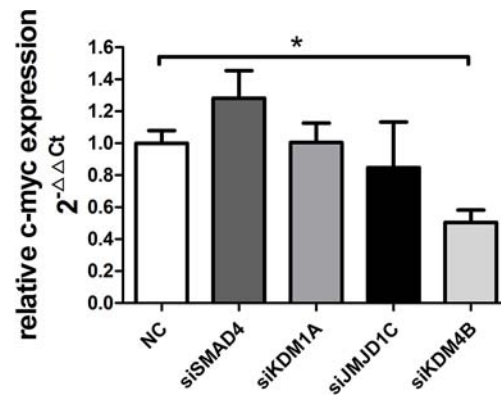

**Supplementary Figure S1: Silencing of KDM4B down-regulated c-myc mRNA expression.** Silencing of KDM4B down-regulated c-myc mRNA expression in qRT-PCR assays in MFE-296 cells ( $*P < 0.05$ ), where as other candidate regulators (KDM1A, JMJD1C and SMAD4) did not affect c-myc expression ( $P > 0.05$ ). All experiments were performed three times, and the data represent the mean fold change  $\pm$  Standard Error (SE).

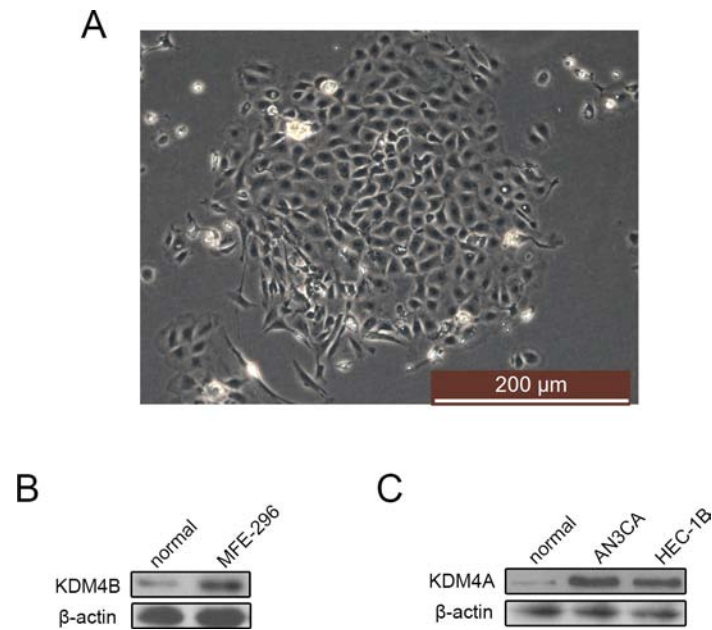

**Supplementary Figure S2: Comparison of expression of KDM4B and KDM4A in normal endometrial cells to EC cells.** **A.** Normal endometrial epithelial cells extracted from normal endometrial tissues in light microscopy. Magnification, 100×. **B.** A western blot evaluating KDM4B protein level in MFE-296 cells and normal endometrial cells extracted from normal endometrial tissue. **C.** A western blot evaluating KDM4A protein level in AN3CA cells, HEC-1B cells and normal endometrial cells extracted from normal endometrial tissue. β-actin was used as loading controls. All experiments were performed three times.

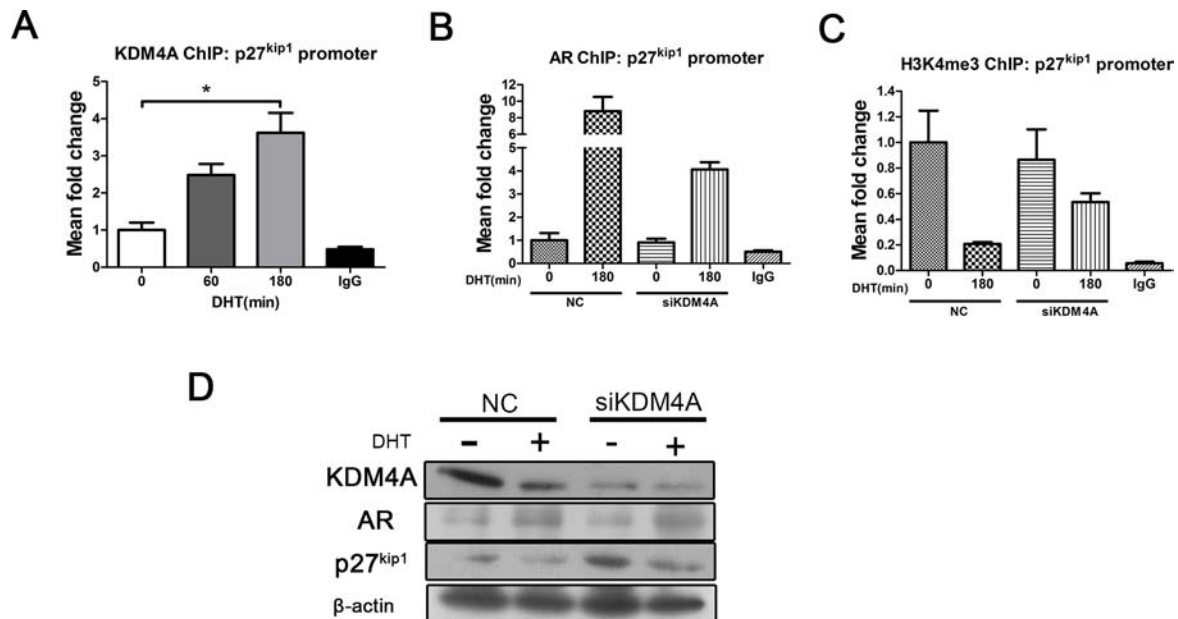

**Supplementary Figure S3: KDM4A suppresses AR target p27<sup>kip1</sup> by demethylating H3K4me3 in response to androgens in HEC-1B cells.** A series of ChIP for **A**. KDM4A at the p27<sup>kip1</sup> promoter in HEC-1B cells treated with DHT (100 nM) for 0, 60, and 180 min. \* $P < 0.05$ , compared with 0 min. **B**. HEC-1B cells were transiently transfected with either negative control (NC) or KDM4A siRNA (siKDM4A) in steroid-depleted media for 72 h with or without 180 min 100 nM DHT stimulation before ChIP with (B) an anti-AR antibody, or **C**. an anti- H3K4me3 antibody, and subsequently analyzed at the p27<sup>kip1</sup> promoter. Nonspecific IgG was used as a negative control. ChIP data are an average of three independent experiments  $\pm$  SE. **D**. HEC-1B cells were subject to transient transfection with either negative control or KDM4A (siKDM4A) siRNAs in steroid-depleted media for 48 h before 24 h 100 nM DHT stimulation, and subsequently protein extraction. AR, KDM4A, p27<sup>kip1</sup> were assessed by Western blotting, with  $\beta$ -actin as loading controls.

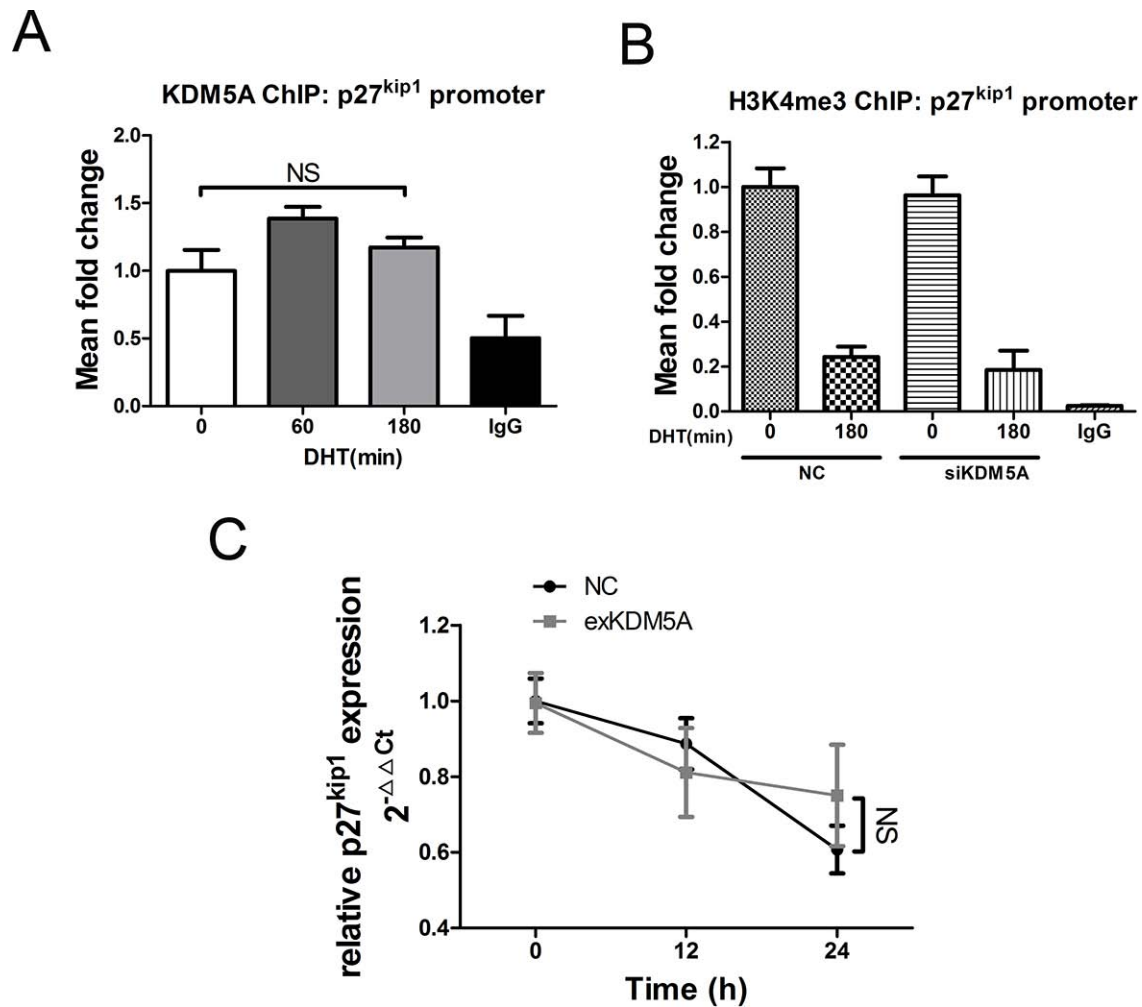

**Supplementary Figure S4: KDM5A did not demethylate H3K4me3 and did not regulate p27<sup>kip1</sup> in response to androgens in AN3CA cells.** A series of ChIP for A. KDM5A at the p27<sup>kip1</sup> promoter in AN3CA cells treated with DHT (100 nM) for 0, 60, and 180 min. NS, not significant. B. AN3CA cells were transiently transfected with either negative control (NC) or KDM5A siRNA (siKDM5A) in steroid-depleted media for 72 h with or without 180 min 100 nM DHT stimulation before ChIP with an anti-H3K4me3 antibody, and subsequently analyzed at the p27<sup>kip1</sup> promoter. Nonspecific IgG was used as a negative control. ChIP data are an average of three independent experiments  $\pm$  SE. C. AN3CA cells were transiently transfected with either negative control (NC) or KDM5A expression plasmid (exKDM5A). Overexpression of KDM5A had no obvious effect on regulating p27<sup>kip1</sup> mRNA expression in qRT-PCR assays in AN3CA cells.

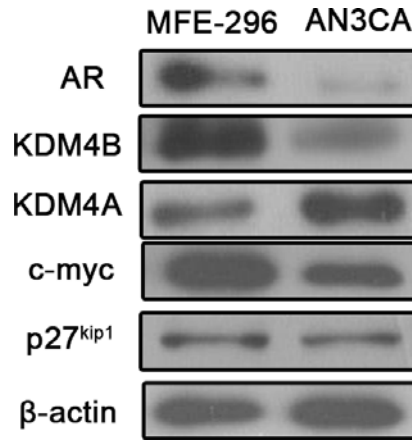

**Supplementary Figure S5: Expression of AR, KDM4B, KDM4A, c-myc, and p27<sup>kip1</sup> in MFE-296 and AN3CA cells.** A western blot evaluating the expression of AR, KDM4B, KDM4A, c-myc, and p27<sup>kip1</sup> in MFE-296 and AN3CA cells were shown. β-actin was used as loading controls.

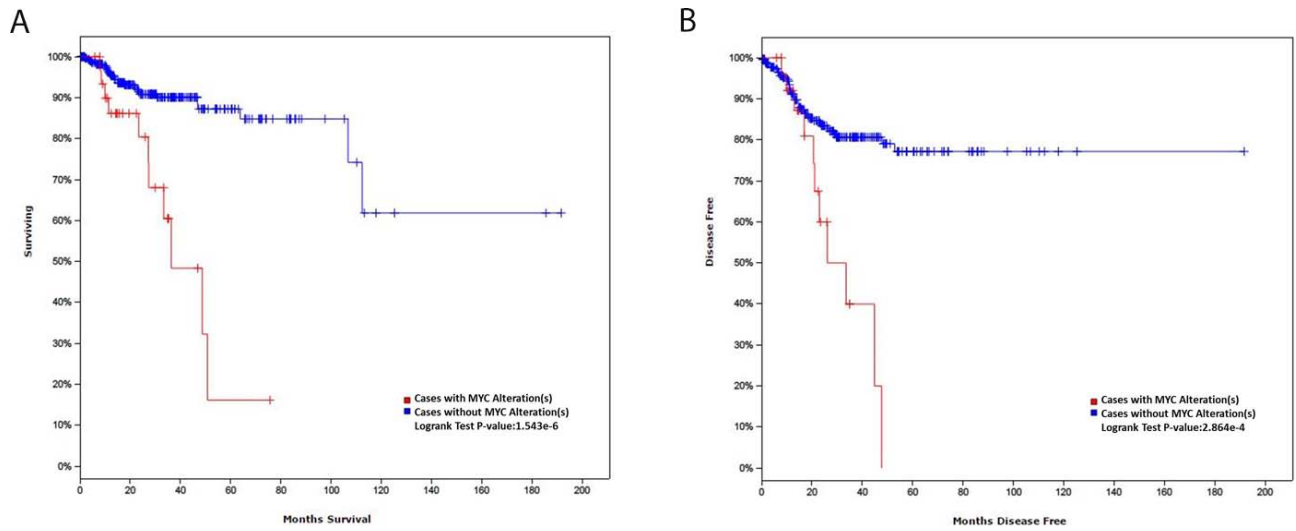

**Supplementary Figure S6: *In silico* analysis identified OS and DFS in EC patients with c-myc alteration.** The Kaplan-Meier **A.** overall survival (OS) and **B.** DFS of uterine corpus endometrioid carcinoma patients from a dataset in The Cancer Genome Atlas stratified by c-myc alteration.
